# Supplementary material
Source: PubMed Central journal article supplement (PMC3152617)
Supplement: NIHMS300236-supplement-01.pdf [file NIHMS300236-supplement-01.pdf]

# Nmnat exerts neuroprotective effects in dendrites and axons

Yuhui Wen, Jay Z. Parrish, Ruina He, R. Grace Zhai, and Michael D. Kim

## Supplementary Figures

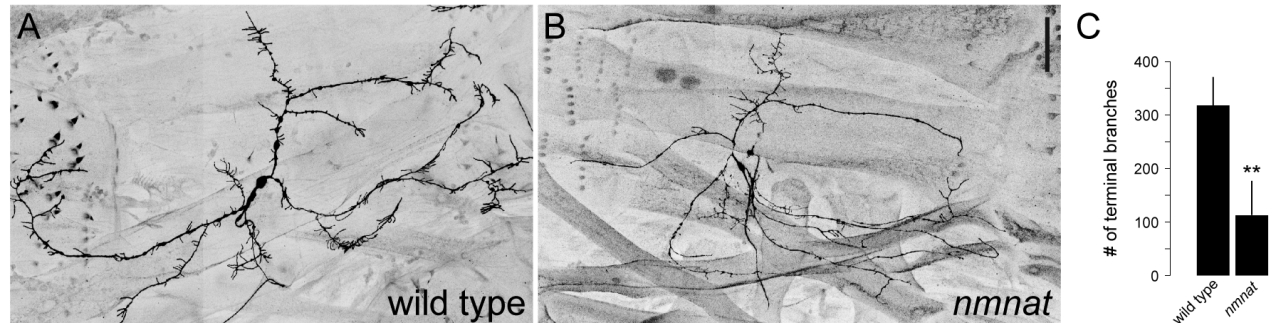

**Supplementary Figure 1.** *nmnat* mutants are defective in terminal dendritic branching of class III neurons. **(A)** Morphology of class III ddaA dendrites in a wild-type third instar larva MARCM clone. Actin-rich protrusions (dendritic spikes) decorate the length of the dendrites. **(B)** The number of dendritic spikes is significantly reduced in *nmnat*<sup>A4792</sup> ddaA clones. **(C)** Quantification of total number of terminal dendritic branches (mean ± SD) in ddaA neurons for wild-type ( $n = 10$ ) and *nmnat*<sup>A4792</sup> ( $n = 11$ ) clones. Double asterisk denotes  $p < 0.001$  relative to wild-type controls (Student's  $t$ -test). Anterior is left and dorsal is up. Scale bar, 50  $\mu\text{m}$ .

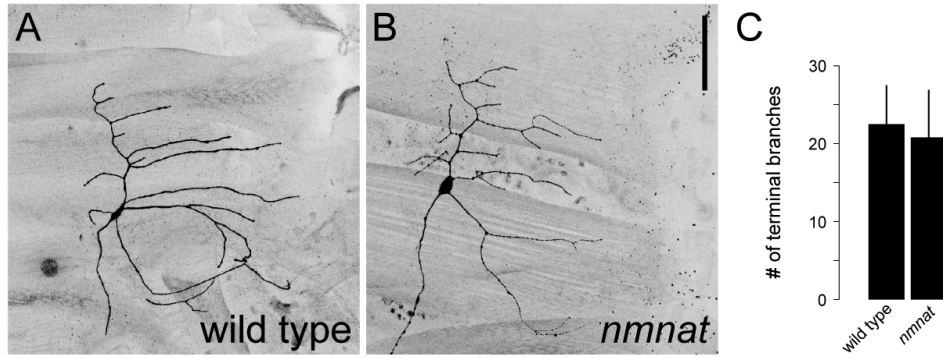

**Supplementary Figure 2.** Loss of *nmnat* function does not cause a significant change in terminal dendritic branching of class I neurons. **(A)** Morphology of class I ddaE dendrites in a wild-type third instar larva MARCM clone. Class I dendrites have few terminal branches. **(B)** The number of dendritic branches is not significantly reduced in *nmnat*<sup>4792</sup> ddaE clones. **(C)** Quantification of total number of terminal dendritic branches (mean ± SD) in ddaE neurons for wild-type ( $n = 12$ ) and *nmnat*<sup>4792</sup> ( $n = 16$ ) clones. Anterior is left and dorsal is up. Scale bar, 50  $\mu\text{m}$ .

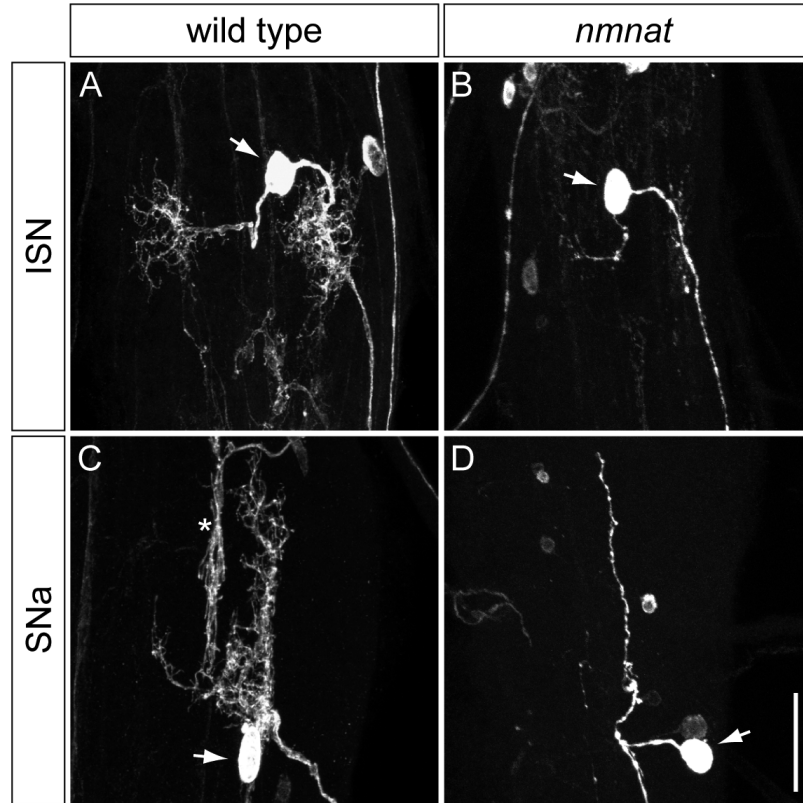

**Supplementary Figure 3.** Dendritic branching of different subclasses of motor neurons is reduced in *nmnat* mutants. (A,B) Dendrite morphology of an intersegmental nerve (ISN) motor neuron clone in wild-type (A) and *nmnat*<sup>44792</sup> mutant (B). (C,D) Dendrite morphology of a segmental nerve a (SNa) motor neuron clone in wild-type (C) and *nmnat*<sup>44792</sup> mutant (D). Arrows indicate cell body. Asterisk indicates interneuron projection. Scale bar, 25  $\mu$ m.
